# Supplementary material for: Immunomodulatory Effect of Flammulina rossica Fermentation Extract on Healthy and Immunosuppressed Mice
Source: MDPI journal article supplement (doi:10.3390/molecules28155825), 2023-08-02
Supplement: s1 [file s1]

Sequence ID: [KC179735.1](#) Length: 796 Number of Matches: 1

Range 1: 39 to 796 [GenBank](#) [Graphics](#)

[▼ Next Match](#) [▲ Previous Match](#)

| Score          | Expect                                                         | Identities   | Gaps       | Strand    |
|----------------|----------------------------------------------------------------|--------------|------------|-----------|
| 1310 bits(709) | 0.0                                                            | 746/762(98%) | 10/762(1%) | Plus/Plus |
| Query 3        | TTG-ACGCTTGTGGCTTCAGGCTGTTGCTGACGGGACCTTCACGGGTTTCGTACGTGCAC   | 61           |            |           |
| Sbjct 39       | TTGAACGCTTGTGGCTTCAGGCTGTTGCTGACGGGACCTTCACGGGTTTCGTACGTGCAC   | 98           |            |           |
| Query 62       | GTCGTAGTTGCAACTTTCTTCGTCCACCTGTGCACACTCTGTAGGTCGGATAACCCCA-    | 120          |            |           |
| Sbjct 99       | GTCGTAGTTGCAACTTTCTTCGTCCACCTGTGCACACTCTGTAGGTCGGATA-CCCCAT    | 157          |            |           |
| Query 121      | TTTGAAGGGTGCACGTC-TTCAAAAGCGCGCTCCCTTTGCCTTCCAGGCCTATGTCCTAT   | 179          |            |           |
| Sbjct 158      | TTTGAAGGGTGCACGTCCTTTAAAAAGCGCGCTCCCTTTGCCTTCCAGGCCTATGTCCTAT  | 217          |            |           |
| Query 180      | AAACACTTTTGTATGTAATGAATGTCATTGATTATTGGACCTCACGTCCTTTAAACTAA    | 239          |            |           |
| Sbjct 218      | AAACACTTTTGTATGTAACGAATGTCATTGATTATTGGACCTCACGTCCTTTAAACTAA    | 277          |            |           |
| Query 240      | ATACAACCTTTCAACAACGGATCTCTGGCTCTCGCATCGATGAAGAACGCAGCGAAATGC   | 299          |            |           |
| Sbjct 278      | ATACAACCTTTCAACAACGGATCTCTGGCTCTCGCATCGATGAAGAACGCAGCGAAATGC   | 337          |            |           |
| Query 300      | GATAACTAATGTGAATTGCAGAAATTCAGTGAATCATCGAGTCTTTGAACGCACCTTGCGC  | 359          |            |           |
| Sbjct 338      | GATAACTAATGTGAATTGCAGAAATTCAGTGAATCATCGAGTCTTTGAACGCACCTTGCGC  | 397          |            |           |
| Query 360      | CCTTCGGCACTCCGAAGGGCATGCCTGTTTGAGTGTGAGTAACTTCTCAACCTCCCTCAC   | 419          |            |           |
| Sbjct 398      | CCTTTGGCACTCCGAAGGGCATGCCTGTTTGAGTGTGAGTAACTTCTCAACCTCCCTCAC   | 457          |            |           |
| Query 420      | TTTGTGTGAGCTGGCGGATTGGATGGTGGGGCTTGCTGGACCTCTCTGGTTCAGCTC      | 479          |            |           |
| Sbjct 458      | TTTGTGTGAGCTGGCGGATTGGAT-GTGGGGCTTGCTGGACCTATCTTGGTTCAGCTC     | 516          |            |           |
| Query 480      | CCCTGAAATGCATTAGCAGAAACCGTTACCTTTTGGCGCGCTGCAGCTGTGATAATTATC   | 539          |            |           |
| Sbjct 517      | CCCTGAAATGCATTAGCAGAAACCGTTACCTTTTGGCGCGCTGCAGCTGTGATAATTATC   | 576          |            |           |
| Query 540      | TACGGCTATGGCTGGGCTGACTGTGTTGTAGCGCTTGTCTCTGAAGGGTTTGGCCC       | 599          |            |           |
| Sbjct 577      | TACGGCTATGGCTGGGCTGACTGTGTTGTAGCGCTTGTCTCTGAAGGG-TTTGGCCC      | 635          |            |           |
| Query 600      | TAGTGGCCCTCCCTTTGCCTTCTCTCAGAGAGATACCTGTGACGCGAGTGCGCGGGC      | 659          |            |           |
| Sbjct 636      | TAGTGGCCCTCCCTTTGCCTTCTCTCAGAGAGATACCTGTGACGCGAGTGCGCGGGC      | 695          |            |           |
| Query 660      | TATTCAGCTTCTAACCGTCCCTTTGGGGACAACCTTATTGACCATTTGACCTCAAAATCAGG | 719          |            |           |
| Sbjct 696      | TATTCAGCTTCTAACCGTCCCTTTGGGGACAAC-TATTGACCATTTGACCTCAAAATCAGG  | 754          |            |           |
| Query 720      | TAGGACTACCGCTGAACCTTAAGCATATCA-TAA-CGG-GGA 758                 |              |            |           |
| Sbjct 755      | TAGGACTACCGCTGAACCTTAAGCATATCAATAAGCGGAGGA 796                 |              |            |           |

**Figure S1.** Results of ITS sequence alignment (Compared with *Flammulina rossica* GenBank: KC179735.1 on NCBI, the similarity was over 99%, and it was identified as *Flammulina rossica*.)
